# Supplementary material for: In vitro selection of RNA aptamers against a conserved region of the Plasmodium falciparum erythrocyte membrane protein 1
Source: PubMed Central journal article supplement — Parasitol Res. 2009 Aug 20;105(6):1557–66. doi: 10.1007/s00436-009-1583-x (PMC2764096; doi:10.1007/s00436-009-1583-x), 2009-08-20
Supplement: 436_2009_1583_MOESM1_ESM.pdf [file 436_2009_1583_MOESM1_ESM.pdf]

>ab230506a01.r\_A01.ab1

TTTACTCCAAACAGAACAGTGGGACTAACAAACATGGCATAACCACCCACAA

>ab230506a06.r\_A06.ab1

AAAATTCCACAAAAACACTGCACACAACCTTCCACCCATCTACGACAAAACAA

>ab230506a07.r\_A07.ab1

CTTTTACATAATTGCAACAATCCCAACGAACAGTCTTCCAACCCCACTCAATGAT  
GAATTGCGTAATACGTACCAACCTCTCCACTCGTC

>ab230506a09.r\_A09.ab1

ATATCCCCAATTTTCGTGCCATCCGCGCGCAATTATTTTCACAAAACGCACCGAAC  
CAGGTTCCGCCTCCGCC

>ab230506a10.r\_A10.ab1

AGGTAACGCGACAATATTTGTATTCCACTCACCTGCCCTACGCCCCCCTC

>ab230506a12.r\_A12.ab1

CCAAATAAAAAAGCCCACTAACCCAACAATACAAACCAATTACCGCCCAA

>ab230506b01.r\_B01.ab1

AGCAGCTACACGAATCCAGGGTAAAACCTGACTTCACCAACCACAGTAAA

>ab230506b02.r\_B02.ab1

TAGCTCACACACCAGCAATCAACGCGTTTTTTTCAAACACTGGCACATGA

>ab230506b03.r\_B03.ab1

ATCACGACCCAACACGCCAAAAACCCACCCGAGCTCACAAACGAATAGGA

>ab230506b04.r\_B04.ab1

CGACCTCATCTAATATTAACGAACACCAACCCTTACAGACTTGCCGTAAT

>ab230506b05.r\_B05.ab1

TACCAAATTCTCAAATTCTATGTAAAGATCATAGAAAAAATCCATGAGTCGGCC  
ACCTGGCTGTCGTC

>ab230506b07.r\_B07.ab1

AGTCCACCCCCATTCAGTTCCCGCAACGCAGCTAACCTCAGTTACAACC

>ab230506b08.r\_B08.ab1

GTAACATCAAACCATAAACAGAATTCCTTCTCCGCGTTACCTACCAAGC

>ab230506b09.r\_B09.ab1

ATTGTGAAGTTTCCAGTAACAAGTAGTCTATCCAACCCCCGCCTAACTCA

>ab230506b10.r\_B10.ab1

AAAATAACAAGGAAACACTACCAACAACCGTTTCCCTATGCCCATCACTCTCAC

>ab230506b11.r\_B11.ab1

GTAAGCAACTCGCAACAAAAATTGTGATAGTAATGCGCCATGTGAATCAA

>ab230506c01.r\_C01.ab1

ATAACACAGGAGAAAACCTAAAGTAAACCTGACCACACCTCCCTAAGCACA

>ab230506c03.r\_C03.ab1

AGATCACAAAACCGTGATAGACAATACACAACTTGAGGCACTTACCACAT

>ab230506c06.r\_C06.ab1

GCAATCACCCATCAAACAAACCCGCCGACTCAAAGAAAAATTTTCATGG

>ab230506c08.r\_C08.ab1

AATTATAGAGAAATGCAATACACTTTTACACTAAAGGCCGGAACATGCA

>ab230506c09.r\_C09.ab1

AACAGCCAAAGAGGCAAGTTAAAAAACGCGAGGGTATCAAAGCGAACTGT

>ab230506c12.r\_C12.ab1

ACTTATAAGTTGAGGTTTTTCATAAGCCCTGCGCAATACACCACTGAT

>ab230506d01.r\_D01.ab1

AATAATCCTCCCGATTGACATACAGCAGCCAATCAAATGGCAGACACAAA

>ab230506d05.r\_D05.ab1

TTGAAAAGGTAGCGCCAGAGCCTGGGCACATGGCACACAAAAAAAAAAAAACAA  
GT

>ab230506d07.r\_D07.ab1

AGTAATACGGCAGCCACACTGCTCTACACAATGGCAACTACGAATGGCA

>ab230506d08.r\_D08.ab1

GTGCCCTATATCAAAGTTTCCGCTGCCAGAAAAATCAAATCCAAGATCA

>ab230506d09.r\_D09.ab1

GTAAGCATTTCACAGCAAGGAAGTTTTTAAACCATAATTTAATCCCGTTT

>ab230506d10.r\_D10.ab1

ACGTCACACGTGCAACTATTCCGCGAATCCACAGATAACAATGTAAGACT

>ab230506d11.r\_D11.ab1

AGCTAACAAGTAAGACAAAAATCCGCATTTATATGGGCCTAAGCCCACCA

>ab230506d12.r\_D12.ab1

AACAATACGACTACACCATCAAAGTATTATCTTGCATCGAAGGTTGGCA

>ab230506e01.r\_E01.ab1  
AGCAATCGAAATCATCCCTACAATATGTTACCATCCAAACACACAGGAAA

>ab230506e02.r\_E02.ab1  
AATCACTAAAACGCCTCCCACCCACTCCAATAATACCGACACA ACTAAGA

>ab230506e03.r\_E03.ab1  
ACAACCATCAAATGGAACACTCACTCCCATACACCTAGCAGACCAATCG

>ab230506e04.r\_E04.ab1  
AAACGAGTAACCACCTATAACAACACGAAGGTTTCATATCAA AATAGACCC

>ab230506e05.r\_E05.ab1  
GTGACCACGCGGATAAATGAATCAAAAACAACAACCAGGGCCGTTTCGACTACGC  
TAATTATCCCG

>ab230506e06.r\_E06.ab1  
ATGAGTGATGCGCATAACCCTTACTCCCACATCCGCGCTCGCAAAGCAGT

>ab230506e07.r\_E07.ab1  
AAGAAAAAATACAGAACAAGTCAAACCAACTACGCTTTCGCTTGAAGCA

>ab230506e08.r\_E08.ab1  
ATGAAACGGTTTGTCAACGCCAGCCTCTAGAAGGGCATCTTTGAACACCC

>ab230506e10.r\_E10.ab1  
TTAAACTCCGCACACAAAACGGACTTGCCCTCAGCACGCCCCCCCCAATA

>ab230506e11.r\_E11.ab1  
ACAACCACCTGGCACCAATCAGAAACATCTACACGACAAAACAACCAAAT

>ab230506e12.r\_E12.ab1  
CAATATACGACGAAGTATTGCGACGGTATACACAAACCGTGTCAATCGCA

>ab230506f02.r\_F02.ab1  
TGGACCTTAATTGCATATTTATATACCCCCAGCTCAACCATTATCGAGT

>ab230506f03.r\_F03.ab1  
ACATATATCGACCACAGAAAAACGTCGTATCCACAAATAATTCCTAACCT

>ab230506f04.r\_F04.ab1  
AAGTCCTATCTTTCGACGACACCAGAGCCAACCAACATCCACCCCGC

>ab230506f05.r\_F05.ab1  
AAATGCACCAGCCTATTATACCTCATTAGCATAAACATCCACACCACAAG

>ab230506f06.r\_F06.ab1  
TGTATAACCATTTAATAACCTGCCTAAGACGGTCGAATCAAAAAGAATC

>ab230506f07.r\_F07.ab1

TCCTCACAAAGAAGAATTACACCTAACCTGACCAGCCCCTAACCATCACT

>ab230506f08.r\_F08.ab1

TCCTCAAACACCACAGTACGTACGTTAATCCAACATAGAAAGACGATTTCG

>ab230506f09.r\_F09.ab1

TGTTATCCAACCCTAAACAGCTAAGAACCAAAGATGCGTAATAAAGTTCT

>ab230506f10.r\_F10.ab1

AAAATACCAACCCACCCATAACCCGCGCGAGCGGCTCACCCACGGCAGG

>ab230506f11.r\_F11.ab1

GAACAAACCATCCTATAACTCGGCCAACATTCAGGACACGTCAGAACAAC

>ab230506f12.r\_F12.ab1

AATAAAAAGAAACAAACGAGACCATAAACAGAGAGGCTTAACTTCAA

>ab230506g01.r\_G01.ab1

CCCACGTAAACCCAAACACACTGATAGTAACCATGTTATTTTGCCGGCAC

>ab230506g02.r\_G02.ab1

AACAATAAAGTACTCATAAATATCACAAACCAAATCCCCTACAAGACCA

>ab230506g03.r\_G03.ab1

GCCTAGTCACATGTGCATCCGGACCCGAGCACCGGCCGATAAATTAATAG

>ab230506g04.r\_G04.ab1

TAAATACCCAAGCAGCAAATAATACTAGTCCAAAGGCGAATAGGAAACAT

>ab230506g05.r\_G05.ab1

TATAATTTACCCAAACTGGCAATTGAAATCTCCGCATAATGACGAAGAC

>ab230506g08.r\_G08.ab1

TCCTCAAACACCACAGTACCTACGTTAATCCAACATAGAACGACGATTTCG

>ab230506g10.r\_G10.ab1

TATAAAATACTCTCACATCGCTGACACCACAACCTGGACAAAAGCAACCT

>A-1

ATCACTGTAAACCAAAAAACAGACCGCTTCACTTACGTAAGACCAAAATC

>A-2

ATATGAAAAGTGCACAACCTACCCTAACCGCTCTGCCATAGCTCGATGT

>A-3

AATGACCGAAACTAAGACGACCTATAAGCCCCATCCATGCACCCATCAT

>A-4

TCTATATGCGCGCCTTTTCTCTCCTCATGGTTGCCATACCGAGGAATACA

>A-5

TTATAGTCTTTTTCACTGTTCTATCGTTAAAACATCTTTTCGCCCCGAA

>A-6

CTAAAACCAGAAACCCACACTTAACAAACCCCAGGGTAGACAACCTCTGAC

>A-7

AACATTACGTCAGCAATCGCACGTCCGCAAACCCTCAACGCTGCGCACGG

>A-8

TTCCACACACATATGCCTAGAAGTCACAATGTAACCACCGCGCAGTCACA

>A-9

TTACTTCCCTTCAGACGCACTCACTTAACAACAATACTAACCATGTGCCGA

>A-10

TTCGGTACCCGACATCACATCACTCAAATAAACTGAGAACACAAGTACCA

>A-11

AAACTCCAGAAGCACACACCCCTTACCCTGCCCTGGCATAGACTCCCACC

>A-12

ACAAAACACACCCATTCTCATGACCCTTATCGCCGCACATCAGCCGGTA

>A-14

TGCAGTCGTATACGCACAATATCTCCGACTACATCGCCCACAA

>A-15

AAACACAAGAAGTAAACCGCTATTTACCCATTAGTTGTAAGTTCCTAAGT

>A-16

AATTCGATAGGTACCGTCATTACAGACTCAGGCAATACCTAACCCAGATG

>A03

AACCGACTAACGCATTATTGGAAATAACAAACGGTAGCCAAACACAACCT

>A04

AGTACTAACACAAGACCAGACTTTATAGAATGAGACCAATACTGCCACAA

>B03

ATGTTAGCGTCAATGCTTCAACACCACCATCAAACGTGAGCCTAAATGA

>C03

ACTCGGATCACGAATATCAAGAACACACTCCCGCACGACCATAGACA

>C05

ATACATGCCACTCACGCCAAGAACACCTAAAACACCTTTCAAACGCAACA

>D03

AATATACGGCCAAAGCAACAGAACAAGGGCCAACACCGCTCCCAATGATC

>D04

TGCAGTCGATGATGAATTGCGTAATACGTAGTAAGCTCTGCAGTCGATGATGAAT  
TGCGTAATAC

>D05

AAGCACGTCTCCGTAACTACTTAACCCACACCCTCATCTCACAAAGCTAC

>E03

GAGCTCGAATTCCTATAGTGAGTCGTATTACGCAAGGGCGAATTCGTTTAAACC  
TGCAGGACTAGTCCCTT  
TAGTGAGGGTTAATTCTGAGCTTGGCGTAATCATGGTCATACTGTTTCCT  
AA

>F03

ATCTGACAACAATTTAAGTTAAATCAACAAAACCGCACTCCCGTGCTACA

>G03

ATACGAGTAAGGTTTGAAGAATAAATCATCGGGTGAGTCAACGTCAATTA

>G04

AAATACCAGACCCACACGCGATTGACCCAATGTAGCCCTTAACTGAGACC
