# Supplementary material for: In vitro selection of RNA aptamers against a conserved region of the Plasmodium falciparum erythrocyte membrane protein 1
Source: PubMed Central journal article supplement — Parasitol Res. 2009 Aug 20;105(6):1557–66. doi: 10.1007/s00436-009-1583-x (PMC2764096; doi:10.1007/s00436-009-1583-x), 2009-08-20
Supplement: 436_2009_1583_MOESM2_ESM.pdf [file 436_2009_1583_MOESM2_ESM.pdf]

## MEME - Motif discovery tool

### TRAINING SET

---

DATAFILE= pasted\_sequences

ALPHABET= ACGT

| Sequence name<br>Length     | Weight | Length | Sequence name         | Weight |
|-----------------------------|--------|--------|-----------------------|--------|
| -----<br>-----              | -----  | -----  | -----                 | -----  |
| ab230506a01.r_A01.ab1<br>52 | 1.0000 | 50     | ab230506a06.r_A06.ab1 | 1.0000 |
| ab230506a07.r_A07.ab1<br>72 | 1.0000 | 90     | ab230506a09.r_A09.ab1 | 1.0000 |
| ab230506a10.r_A10.ab1<br>50 | 1.0000 | 50     | ab230506a12.r_A12.ab1 | 1.0000 |
| ab230506b01.r_B01.ab1<br>50 | 1.0000 | 50     | ab230506b02.r_B02.ab1 | 1.0000 |
| ab230506b03.r_B03.ab1<br>50 | 1.0000 | 50     | ab230506b04.r_B04.ab1 | 1.0000 |
| ab230506b05.r_B05.ab1<br>50 | 1.0000 | 69     | ab230506b07.r_B07.ab1 | 1.0000 |
| ab230506b08.r_B08.ab1<br>50 | 1.0000 | 50     | ab230506b09.r_B09.ab1 | 1.0000 |
| ab230506b10.r_B10.ab1<br>50 | 1.0000 | 55     | ab230506b11.r_B11.ab1 | 1.0000 |
| ab230506c01.r_C01.ab1<br>51 | 1.0000 | 50     | ab230506c03.r_C03.ab1 | 1.0000 |
| ab230506c06.r_C06.ab1<br>49 | 1.0000 | 50     | ab230506c08.r_C08.ab1 | 1.0000 |
| ab230506c09.r_C09.ab1<br>47 | 1.0000 | 50     | ab230506c12.r_C12.ab1 | 1.0000 |
| ab230506d01.r_D01.ab1<br>55 | 1.0000 | 50     | ab230506d05.r_D05.ab1 | 1.0000 |
| ab230506d07.r_D07.ab1<br>50 | 1.0000 | 49     | ab230506d08.r_D08.ab1 | 1.0000 |
| ab230506d09.r_D09.ab1<br>50 | 1.0000 | 50     | ab230506d10.r_D10.ab1 | 1.0000 |
| ab230506d11.r_D11.ab1<br>50 | 1.0000 | 50     | ab230506d12.r_D12.ab1 | 1.0000 |
| ab230506e01.r_E01.ab1<br>50 | 1.0000 | 50     | ab230506e02.r_E02.ab1 | 1.0000 |
| ab230506e03.r_E03.ab1<br>50 | 1.0000 | 49     | ab230506e04.r_E04.ab1 | 1.0000 |
| ab230506e05.r_E05.ab1<br>50 | 1.0000 | 65     | ab230506e06.r_E06.ab1 | 1.0000 |
| ab230506e07.r_E07.ab1<br>50 | 1.0000 | 51     | ab230506e08.r_E08.ab1 | 1.0000 |
| ab230506e10.r_E10.ab1<br>50 | 1.0000 | 50     | ab230506e11.r_E11.ab1 | 1.0000 |
| ab230506e12.r_E12.ab1<br>50 | 1.0000 | 50     | ab230506f02.r_F02.ab1 | 1.0000 |
| ab230506f03.r_F03.ab1<br>50 | 1.0000 | 50     | ab230506f04.r_F04.ab1 | 1.0000 |

|                             |        |     |                       |        |
|-----------------------------|--------|-----|-----------------------|--------|
| ab230506f05.r_F05.ab1<br>49 | 1.0000 | 50  | ab230506f06.r_F06.ab1 | 1.0000 |
| ab230506f07.r_F07.ab1<br>50 | 1.0000 | 50  | ab230506f08.r_F08.ab1 | 1.0000 |
| ab230506f09.r_F09.ab1<br>49 | 1.0000 | 50  | ab230506f10.r_F10.ab1 | 1.0000 |
| ab230506f11.r_F11.ab1<br>49 | 1.0000 | 50  | ab230506f12.r_F12.ab1 | 1.0000 |
| ab230506g01.r_G01.ab1<br>49 | 1.0000 | 50  | ab230506g02.r_G02.ab1 | 1.0000 |
| ab230506g03.r_G03.ab1<br>50 | 1.0000 | 50  | ab230506g04.r_G04.ab1 | 1.0000 |
| ab230506g05.r_G05.ab1<br>50 | 1.0000 | 50  | ab230506g08.r_G08.ab1 | 1.0000 |
| ab230506g10.r_G10.ab1<br>51 | 1.0000 | 50  | A-1                   | 1.0000 |
| A-2<br>50                   | 1.0000 | 49  | A-3                   | 1.0000 |
| A-4<br>49                   | 1.0000 | 50  | A-5                   | 1.0000 |
| A-6<br>50                   | 1.0000 | 51  | A-7                   | 1.0000 |
| A-8<br>53                   | 1.0000 | 50  | A-9                   | 1.0000 |
| A-10<br>50                  | 1.0000 | 50  | A-11                  | 1.0000 |
| A-12<br>43                  | 1.0000 | 50  | A-14                  | 1.0000 |
| A-15<br>50                  | 1.0000 | 50  | A-16                  | 1.0000 |
| A03<br>50                   | 1.0000 | 50  | A04                   | 1.0000 |
| B03<br>49                   | 1.0000 | 49  | C03                   | 1.0000 |
| C05<br>50                   | 1.0000 | 50  | D03                   | 1.0000 |
| D04<br>50                   | 1.0000 | 65  | D05                   | 1.0000 |
| E03<br>50                   | 1.0000 | 124 | F03                   | 1.0000 |
| G03<br>50                   | 1.0000 | 50  | G04                   | 1.0000 |

**MOTIF 1** width = 7 sites = 10 llr = 85 E-value = 1.2e+004

**Simplified** A 1 a 4 : : : 2  
**pos.-specific** C : : 1 : 1 : :  
**probability** G 9 : 5 a 5 : :  
**matrix** T : : : : 4 a 8

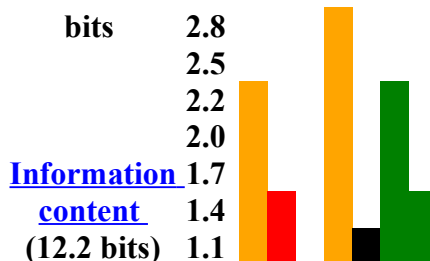



|                       |    |          |            |               |            |
|-----------------------|----|----------|------------|---------------|------------|
| ab230506g05.r_G05.ab1 | 30 | 9.15e-05 | GCAATTGAAA | T C T C C G C | ATAATGACGA |
| ab230506b08.r_B08.ab1 | 30 | 9.15e-05 | AGAATTCCCT | T C T C C G C | GTTACCTACC |
| ab230506f04.r_F04.ab1 | 12 | 1.53e-04 | AGTCCTATCT | T T C C C G C | ACGACACCAG |
| ab230506b07.r_B07.ab1 | 19 | 1.53e-04 | CCCCATTCAG | T T C C C G C | AACGCAGCTA |
| A-12                  | 31 | 1.84e-04 | ATGACCCTTA | T C G C C G C | ACATCAGCCG |
| ab230506b04.r_B04.ab1 | 41 | 1.97e-04 | CCTTACAGAC | T T G C C G T | AAT        |
| D05                   | 8  | 2.44e-04 | AAGCACG    | T C T C C G T | AACTACTTAA |
| A-5                   | 37 | 2.44e-04 | TTAAAACATC | T T T T C G C | CCGCAA     |

**MOTIF 3** width = 6 sites = 10 llr = 75 E-value = 1.5e+006

**Simplified pos.-specific probability matrix**  
A : 1 : : 4 :  
C : : : a : :  
G : 4 8 : 6 :  
T a 5 2 : : a

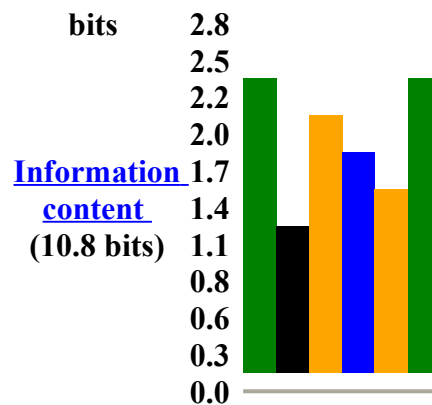

**Multilevel consensus sequence**  
T T G C G T  
G T A

| NAME                  | START | P-VALUE  | SITES      |             |            |
|-----------------------|-------|----------|------------|-------------|------------|
| E03                   | 95    | 3.32e-05 | ATTCTGAGCT | T G G C G T | AATCATGGTC |
| D04                   | 17    | 7.89e-05 | CGATGATGAA | T T G C G T | AATACGTAGT |
| ab230506a07.r_A07.ab1 | 59    | 7.89e-05 | CAATGATGAA | T T G C G T | AATACGTACC |
| A-11                  | 34    | 1.64e-04 | TACCCTGCC  | T G G C A T | AGACTCCCAC |
| ab230506a01.r_A01.ab1 | 34    | 1.64e-04 | ACTAACAACA | T G G C A T | ACCACCCACA |
| ab230506f02.r_F02.ab1 | 11    | 2.80e-04 | TGGACCTTAA | T T G C A T | ATTTATATAC |
| ab230506d12.r_D12.ab1 | 33    | 2.80e-04 | AAGTATTATC | T T G C A T | CGAAGGTTGG |
| ab230506b05.r_B05.ab1 | 63    | 3.26e-04 | GCCACCTGGC | T G T C G T | C          |
| ab230506a09.r_A09.ab1 | 11    | 3.89e-04 | ATATCCCCAA | T T T C G T | GCCATCCGCG |
| B03                   | 5     | 4.74e-04 | ATGT       | T A G C G T | CAATGCTTCA |

**MOTIF 4** width = 7 sites = 12 llr = 89 E-value = 6.4e+007

**Simplified pos.-specific probability**  
A : : 8 6 : : 4  
C : a : 2 : 8 :  
G a : 2 3 : : 6

matrix T : : : : a 3 :

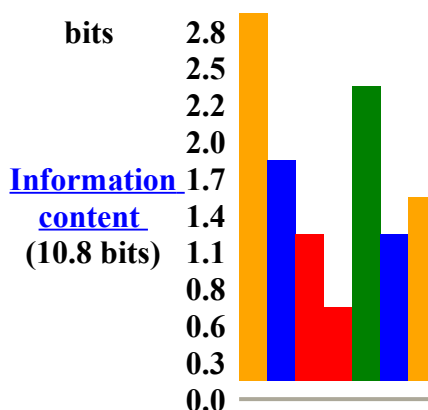

Multilevel consensus sequence  
 G C A A T C G  
           G T A

| NAME                  | START | P-VALUE  | SITES                               |
|-----------------------|-------|----------|-------------------------------------|
| D04                   | 2     | 1.83e-05 | T G C A G T C G ATGATGAATT          |
| A-14                  | 2     | 1.83e-05 | T G C A G T C G TATACGCACA          |
| A-7                   | 13    | 6.50e-05 | CATTACGTCA G C A A T C G CACGTCCGCA |
| ab230506e01.r_E01.ab1 | 2     | 6.50e-05 | A G C A A T C G AAATCATCCC          |
| ab230506g05.r_G05.ab1 | 20    | 1.33e-04 | ACCCAAACTG G C A A T T G AAATCTCCGC |
| A-8                   | 42    | 2.18e-04 | TAACCACCGC G C A G T C A CA         |
| ab230506c06.r_C06.ab1 | 1     | 3.37e-04 | G C A A T C A CCCATCAAAC            |
| ab230506b02.r_B02.ab1 | 16    | 3.37e-04 | CACCACACCA G C A A T C A ACGCGTTTTT |
| G04                   | 18    | 3.54e-04 | AGACCCACAC G C G A T T G ACCCAATGTA |
| ab230506e06.r_E06.ab1 | 35    | 3.94e-04 | TCCCACATCC G C G C T C G CAAAGCAGT  |
| ab230506a09.r_A09.ab1 | 28    | 5.69e-04 | CCATCCGCGC G C A A T T A TTTTCACAAA |
| A-9                   | 17    | 6.66e-04 | CCCTTCAGAC G C A C T C A CTTAACAACA |

**MOTIF 5** width = 7 sites = 10 llr = 75 E-value = 8.4e+007

Simplified pos.-specific probability matrix  
 A a : : : 2 3 :  
 C : a 9 : : 4 a  
 G : : : : 8 3 :  
 T : : 1 a : : :

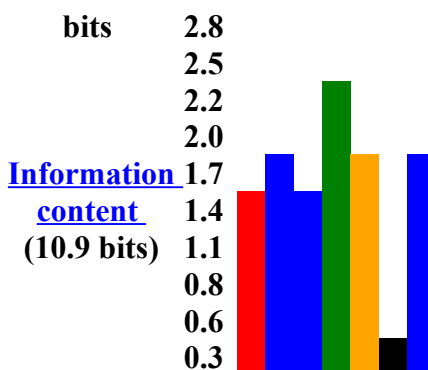

0.0

Multilevel consensus sequence  
 A C C T G C C  
                   A A  
                           G

| NAME                  | START | P-VALUE  | SITES                               |
|-----------------------|-------|----------|-------------------------------------|
| ab230506e11.r_E11.ab1 | 7     | 3.81e-05 | ACAACC A C C T G G C AC CAATCAGA    |
| ab230506b05.r_B05.ab1 | 56    | 3.81e-05 | TGAGTCGGCC A C C T G G C TGTCGTC    |
| ab230506f06.r_F06.ab1 | 18    | 1.17e-04 | CCATTTAATA A C C T G C C TAAGACGGTC |
| ab230506a10.r_A10.ab1 | 31    | 1.17e-04 | TATTCCACTC A C C T G C C CTACGCCCC  |
| ab230506f07.r_F07.ab1 | 26    | 2.14e-04 | ATTACACCTA A C C T G A C CAGCCCCTAA |
| ab230506c01.r_C01.ab1 | 26    | 2.14e-04 | ACTAAAGTAA A C C T G A C CACACCTCCC |
| ab230506b01.r_B01.ab1 | 26    | 2.14e-04 | CCAGGGTAAA A C C T G A C TTCACCAACC |
| ab230506e10.r_E10.ab1 | 23    | 3.89e-04 | CACAAAACGG A C T T G C C CTCAGCACGC |
| ab230506e03.r_E03.ab1 | 33    | 3.89e-04 | ACTCCCATAC A C C T A G C AGACCAATCG |
| A-2                   | 17    | 6.56e-04 | AAAGTGCACA A C C T A C C CTAACCGCTC |

**MOTIF 6** width = 7 sites = 12 llr = 90 E-value = 2.0e+007

Simplified pos.-specific probability matrix  
 A : : 4 9 : 7 :  
 C : : : : : 1 8  
 G a : 6 1 6 1 2  
 T : a : : 4 2 :

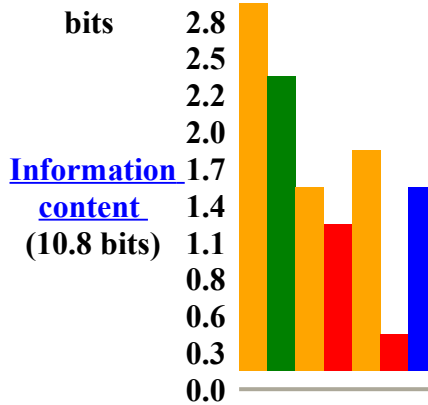

Multilevel consensus sequence  
 G T G A G A C  
                   A T

| NAME                  | START | P-VALUE  | SITES                               |
|-----------------------|-------|----------|-------------------------------------|
| G03                   | 33    | 6.54e-05 | AAATCATCGG G T G A G T C AACGTCAATT |
| E03                   | 19    | 6.54e-05 | ATTCCCTATA G T G A G T C GTATTACGCA |
| A-1                   | 38    | 1.42e-04 | CTTCACTTAC G T A A G A C CAAAATC    |
| ab230506d11.r_D11.ab1 | 10    | 1.42e-04 | AGCTAACAA G T A A G A C AAAAAATCCGC |
| ab230506d10.r_D10.ab1 | 43    | 1.42e-04 | AGATAACAAT G T A A G A C T          |

|                       |    |          |            |               |            |
|-----------------------|----|----------|------------|---------------|------------|
| ab230506a01.r_A01.ab1 | 19 | 1.68e-04 | AAACAGAACA | G T G G G A C | TAACAACATG |
| ab230506c03.r_C03.ab1 | 14 | 1.82e-04 | TCACAAAACC | G T G A T A G | ACAATACACA |
| ab230506b11.r_B11.ab1 | 24 | 1.82e-04 | AACAAAATT  | G T G A T A G | TAATGCGCCA |
| ab230506e06.r_E06.ab1 | 5  | 2.00e-04 | ATGA       | G T G A T G C | GCATAACCCT |
| D04                   | 59 | 2.98e-04 | GATGAATTGC | G T A A T A C |            |
| B03                   | 36 | 2.98e-04 | ACCATCAAAC | G T G A G C C | TAAATGA    |
| ab230506d07.r_D07.ab1 | 2  | 2.98e-04 | A          | G T A A T A C | GGCAGCCACA |

**MOTIF 7** width = 7 sites = 10 llr = 79 E-value = 4.1e+006

**Simplified pos.-specific probability matrix**  
A : : : 8 1 1 :  
C : : 1 : 3 9 6  
G 9 a : : 6 : 4  
T 1 : 9 2 : : :

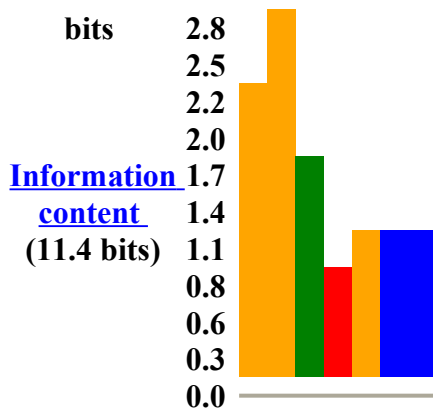

**Multilevel consensus sequence**  
G G T A G C C  
T C G

| NAME                  | START | P-VALUE  | SITES                               |
|-----------------------|-------|----------|-------------------------------------|
| ab230506d05.r_D05.ab1 | 8     | 8.79e-06 | TTGAAAA G G T A G C G CCAGAGCCTG    |
| A03                   | 33    | 2.71e-05 | AATAACAAAC G G T A G C C AAACACAACC |
| A-4                   | 29    | 4.17e-05 | CTCTCCTCAT G G T T G C C ATACCGAGGA |
| A-16                  | 10    | 5.99e-05 | AATTCGATA G G T A C C G TCATTACAGA  |
| A-10                  | 4     | 9.80e-05 | TTC G G T A C C C GACATCACAT        |
| ab230506a09.r_A09.ab1 | 58    | 1.08e-04 | CACCGAACCA G G T T C C G CCTCCGCC   |
| ab230506a10.r_A10.ab1 | 2     | 1.87e-04 | A G G T A A C G CGACAATATT          |
| A-6                   | 35    | 2.09e-04 | CAAACCCAG G G T A G A C AACCTCTGAC  |
| G04                   | 31    | 2.62e-04 | ATTGACCCAA T G T A G C C CTTAACTGAG |
| ab230506d07.r_D07.ab1 | 9     | 2.62e-04 | AGTAATAC G G C A G C C ACCTGCTCT    |

**MOTIF 8** width = 7 sites = 10 llr = 75 E-value = 1.9e+008

**Simplified pos.-specific probability matrix**  
A : 9 4 1 : 6 :  
C a : 6 : : 2 :  
G : 1 : : a : :  
T : : : 9 : 2 a





sequence

C

| NAME                  | START | P-VALUE  | SITES      |   |   |   |   |   |   |            |
|-----------------------|-------|----------|------------|---|---|---|---|---|---|------------|
| ab230506d11.r_D11.ab1 | 33    | 6.16e-05 | CCGCATTTAT | A | T | G | G | G | C | CTAAGCCCAC |
| A-9                   | 45    | 1.46e-04 | TACACTAACC | A | T | G | T | G | C | CGA        |
| ab230506g03.r_G03.ab1 | 11    | 1.46e-04 | GCCTAGTCAC | A | T | G | T | G | C | ATCCGGACCC |
| E03                   | 35    | 2.61e-04 | CGTATTACGC | A | A | G | G | G | C | GAATTCGTTT |
| D03                   | 25    | 2.61e-04 | GCAACAGAAC | A | A | G | G | G | C | CAACACCGCT |
| ab230506e08.r_E08.ab1 | 31    | 2.61e-04 | CAGCCTCTAG | A | A | G | G | G | C | ATCTTTGAAC |
| A-4                   | 6     | 3.89e-04 | TCTAT      | A | T | G | C | G | C | GCCTTTTCTC |
| ab230506b11.r_B11.ab1 | 33    | 3.89e-04 | TGTGATAGTA | A | T | G | C | G | C | CATGTGAATC |
| A-2                   | 8     | 5.46e-04 | ATATGAA    | A | A | G | T | G | C | ACAACCTACC |
| ab230506d05.r_D05.ab1 | 22    | 5.96e-04 | GCGCCAGAGC | C | T | G | G | G | C | ACATGGCACA |

**MOTIF 10** width = 6 sites = 10 llr = 71 E-value = 1.6e+008

Simplified pos.-specific probability matrix  
 A : 9 6 : : :  
 C : 1 2 : : :  
 G : : : 7 : :  
 T a : 2 3 a a

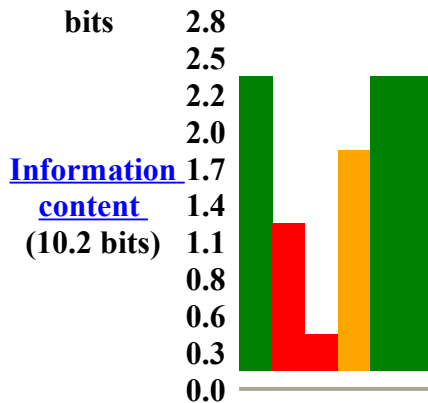

Multilevel consensus sequence  
 T A A G T T  
 C T  
 T

| NAME                  | START | P-VALUE  | SITES      |   |   |   |   |   |   |            |
|-----------------------|-------|----------|------------|---|---|---|---|---|---|------------|
| F03                   | 15    | 1.43e-04 | GACAACAATT | T | A | A | G | T | T | AAATCAACAA |
| A-15                  | 38    | 1.43e-04 | CCATTAGTTG | T | A | A | G | T | T | CCTAAGT    |
| ab230506c12.r_C12.ab1 | 6     | 1.43e-04 | ACTTA      | T | A | A | G | T | T | GAGGTTTTCA |
| ab230506e01.r_E01.ab1 | 24    | 2.20e-04 | ATCCCTACAA | T | A | T | G | T | T | ACCATCCAAA |
| ab230506g08.r_G08.ab1 | 21    | 3.37e-04 | CCACAGTACC | T | A | C | G | T | T | AATCCAACAT |
| ab230506f08.r_F08.ab1 | 21    | 3.37e-04 | CCACAGTACG | T | A | C | G | T | T | AATCCAACAT |
| ab230506g05.r_G05.ab1 | 3     | 5.34e-04 | TA         | T | A | A | T | T | T | CACCCAAACT |
| ab230506d09.r_D09.ab1 | 35    | 5.34e-04 | TTTTAAACCA | T | A | A | T | T | T | AATCCCCTTT |
| ab230506g01.r_G01.ab1 | 37    | 6.40e-04 | GTAACCATGT | T | A | T | T | T | T | GCCGGCAC   |

**MOTIF 11** width = 6 sites = 10 llr = 69 E-value = 2.6e+009

Simplified pos.-specific probability matrix  
 A a : : a a a  
 C : : a : : :  
 G : : : : : :  
 T : a : : : :

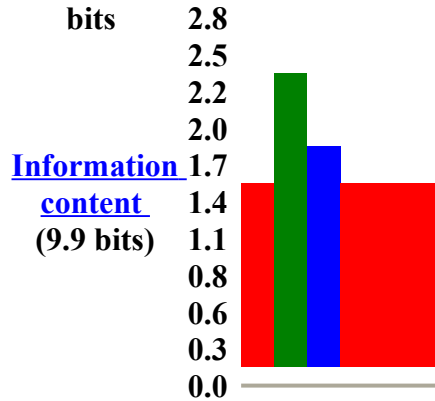

Multilevel consensus sequence A T C A A A

| NAME                  | START | P-VALUE  | SITES                             |
|-----------------------|-------|----------|-----------------------------------|
| B03                   | 29    | 1.03e-03 | CAACACCACC A T C A A A CGTGAGCCTA |
| ab230506f06.r_F06.ab1 | 37    | 1.03e-03 | AGACGGTCGA A T C A A A AAGAATC    |
| ab230506e05.r_E05.ab1 | 21    | 1.03e-03 | GGATAAATGA A T C A A A AACACAACC  |
| ab230506e04.r_E04.ab1 | 37    | 1.03e-03 | GAAGGTTTCAT A T C A A A ATAGACCC  |
| ab230506e03.r_E03.ab1 | 7     | 1.03e-03 | ACAACC A T C A A A TGGAACACTC     |
| ab230506d12.r_D12.ab1 | 18    | 1.03e-03 | CGACTACACC A T C A A A AGTATTATCT |
| ab230506d08.r_D08.ab1 | 10    | 1.03e-03 | GTGCCCTAT A T C A A A GTTTCGCTG   |
| ab230506d01.r_D01.ab1 | 32    | 1.03e-03 | ACAGCAGCCA A T C A A A TGGCAGACAC |
| ab230506c06.r_C06.ab1 | 11    | 1.03e-03 | GCAATCACCC A T C A A A CAAACCCGCC |
| ab230506b08.r_B08.ab1 | 6     | 1.03e-03 | GTAAC A T C A A A CCATAAACAG      |

**MOTIF 12** width = 7 sites = 10 llr = 72 E-value = 4.1e+009

Simplified pos.-specific probability matrix  
 A : : : : 6 : 9  
 C : : 3 6 : a :  
 G : : : 1 : : :  
 T a a 7 3 4 : 1

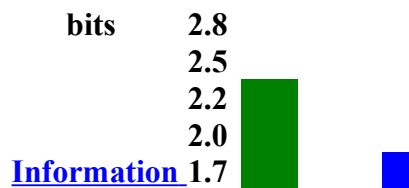

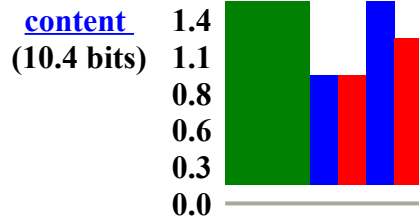

**Multilevel consensus sequence**  
 T T T C A C A  
 C T T

| NAME                  | START | P-VALUE  | SITES                               |
|-----------------------|-------|----------|-------------------------------------|
| ab230506d09.r_D09.ab1 | 8     | 1.36e-04 | GTAAGCA T T T C A C A GCAAGGAAGT    |
| ab230506a09.r_A09.ab1 | 36    | 1.36e-04 | GCGCAATTAT T T T C A C A AAACGCACCG |
| ab230506b02.r_B02.ab1 | 29    | 1.68e-04 | ATCAACGCGT T T T T T C A AACACTGGCA |
| ab230506c08.r_C08.ab1 | 24    | 2.26e-04 | TGCAATACAC T T T T A C A CTAAAGGCCG |
| ab230506a07.r_A07.ab1 | 2     | 2.26e-04 | C T T T T A C A TAATTGCAAC          |
| ab230506e08.r_E08.ab1 | 10    | 2.49e-04 | ATGAAACGG T T T G T C A ACGCCAGCCT  |
| A-12                  | 15    | 3.64e-04 | AACACACCCA T T C C T C A TGACCCTTAT |
| A-8                   | 1     | 4.97e-04 | T T C C A C A CACATATGCC            |
| ab230506a06.r_A06.ab1 | 5     | 4.97e-04 | AAAA T T C C A C A AAAACACTGC       |
| A-4                   | 16    | 5.71e-04 | ATGCGCGCCT T T T C T C T CCTCATGGTT |

**MOTIF 13** width = 7 sites = 10 llr = 69 E-value = 1.0e+011

**Simplified pos.-specific probability matrix**  
 A a 8 : 9 1 : 9  
 C : 2 : : 9 2 :  
 G : : 9 1 : 8 1  
 T : : 1 : : : :

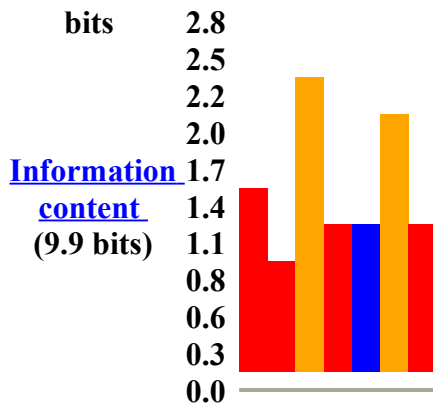

**Multilevel consensus sequence**  
 A A G A C G A  
 C C

| NAME | START | P-VALUE | SITES |
|------|-------|---------|-------|
|------|-------|---------|-------|

|                       |    |          |            |               |            |
|-----------------------|----|----------|------------|---------------|------------|
| A-3                   | 14 | 1.06e-04 | GACCGAAACT | A A G A C G A | CCTATAAGCC |
| ab230506f08.r_F08.ab1 | 40 | 1.06e-04 | CCAACATAGA | A A G A C G A | TTCG       |
| ab230506g08.r_G08.ab1 | 40 | 2.76e-04 | CCAACATAGA | A C G A C G A | TTCG       |
| ab230506g04.r_G04.ab1 | 33 | 2.76e-04 | TACTAGTCCA | A A G G C G A | ATAGGAAACA |
| ab230506f06.r_F06.ab1 | 26 | 2.76e-04 | TAACCTGCCT | A A G A C G G | TCGAATCAAA |
| ab230506e12.r_E12.ab1 | 7  | 2.76e-04 | CAATAT     | A C G A C G A | AGTATTGCGA |
| A04                   | 12 | 4.97e-04 | GTACTAACAC | A A G A C C A | GACTTTATAG |
| ab230506g02.r_G02.ab1 | 43 | 4.97e-04 | AATCCCCTAC | A A G A C C A |            |
| ab230506f07.r_F07.ab1 | 9  | 7.11e-04 | TCCTCACA   | A A G A A G A | ATTACACCTA |
| ab230506d12.r_D12.ab1 | 4  | 8.58e-04 | AAC        | A A T A C G A | CTACACCATC |

**MOTIF 14** width = 7 sites = 10 llr = 73 E-value = 2.5e+009

Simplified pos.-specific probability matrix  
A : : 9 9 : : 9  
C 2 : : : 6 a :  
G 8 : 1 : 4 : :  
T : a : 1 : : 1

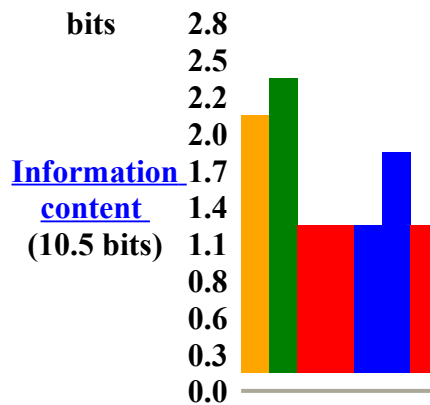

Multilevel consensus sequence  
G T A A C C A  
C G

| NAME                  | START | P-VALUE  | SITES         |               |            |
|-----------------------|-------|----------|---------------|---------------|------------|
| ab230506d09.r_D09.ab1 | 1     | 5.73e-05 | G T A A G C A |               | TTTCACAGCA |
| ab230506b11.r_B11.ab1 | 1     | 5.73e-05 | G T A A G C A |               | ACTCGCAACA |
| A-8                   | 31    | 1.76e-04 | AAGTCACAAT    | G T A A C C A | CCGCGCAGTC |
| ab230506g01.r_G01.ab1 | 27    | 1.76e-04 | CACACTGATA    | G T A A C C A | TGTTATTTTG |
| ab230506e04.r_E04.ab1 | 7     | 1.76e-04 | AAACGA        | G T A A C C A | CCTATAACAA |
| D04                   | 31    | 3.07e-04 | GTAATACGTA    | G T A A G C T | CTGCAGTCGA |
| ab230506e05.r_E05.ab1 | 1     | 3.07e-04 |               | G T G A C C A | CGCGGATAAA |
| ab230506f03.r_F03.ab1 | 27    | 4.36e-04 | GAAAAACGTC    | G T A T C C A | CAAATAATTC |
| ab230506c01.r_C01.ab1 | 42    | 5.55e-04 | CCACACCTCC    | C T A A G C A | CA         |
| ab230506f07.r_F07.ab1 | 39    | 8.03e-04 | TGACCAGCCC    | C T A A C C A | TCACT      |

**MOTIF 15** width = 6 sites = 10 llr = 65 E-value = 1.0e+011

Simplified A : : 3 : 3 :

**pos.-specific probability matrix** C a 4 : a : a  
 G : : 7 : 7 :  
 T : 6 : : : :

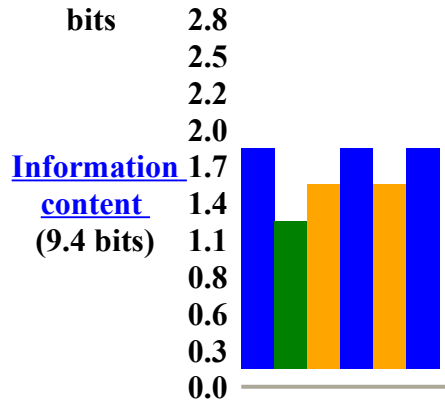

**Multilevel consensus sequence** C T G C G C  
 C A A

| NAME                  | START | P-VALUE  | SITES                             |
|-----------------------|-------|----------|-----------------------------------|
| A-7                   | 41    | 1.04e-04 | ACCCTCAACG C T G C G C ACGG       |
| ab230506c12.r_C12.ab1 | 28    | 1.04e-04 | TTCATAAGCC C T G C G C AATACACCAC |
| ab230506f10.r_F10.ab1 | 23    | 2.62e-04 | CACCCATAAC C C G C G C GAGCGGCTCA |
| ab230506a09.r_A09.ab1 | 22    | 2.62e-04 | TTCGTGCCAT C C G C G C GCAATTATTT |
| ab230506e07.r_E07.ab1 | 31    | 7.96e-04 | GTCAAACCAA C T A C G C TTTCCGCTTG |
| ab230506e05.r_E05.ab1 | 49    | 7.96e-04 | GGCCGTTCGA C T A C G C TAATTATCCC |
| ab230506a10.r_A10.ab1 | 38    | 7.96e-04 | CTCACCTGCC C T A C G C CCCCCTC    |
| ab230506a06.r_A06.ab1 | 18    | 7.96e-04 | CACAAAAACA C T G C A C ACAACTTCCA |
| F03                   | 33    | 1.60e-03 | ATCAACAAAA C C G C A C TCCCGTGCTA |
| C03                   | 31    | 1.60e-03 | GAACACACTC C C G C A C GACACCATAG |

**MOTIF 16** width = 6 sites = 10 llr = 67 E-value = 3.4e+009

**Simplified pos.-specific probability matrix** A : : a : 6 :  
 C : : : 3 3 2  
 G : : : : : 8  
 T a a : 7 1 :

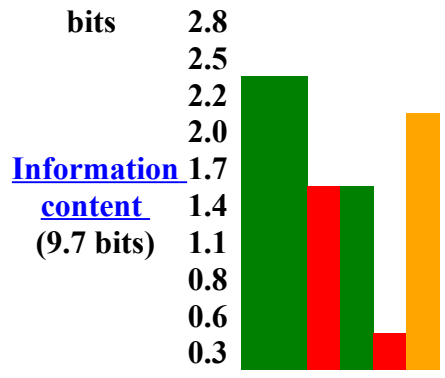



|                       |    |          |            |               |            |
|-----------------------|----|----------|------------|---------------|------------|
| ab230506b01.r_B01.ab1 | 16 | 1.97e-04 | CTACACGAAT | C C A G G G T | AAAACCTGAC |
| ab230506f10.r_F10.ab1 | 40 | 3.92e-04 | AGCGGCTCAC | C C A C G G C | AGG        |
| F03                   | 40 | 4.23e-04 | AAACCGCACT | C C C G T G C | TACA       |
| ab230506f02.r_F02.ab1 | 28 | 7.36e-04 | TTTATATACC | C C C C A G C | TCAACCATTA |
| ab230506f08.r_F08.ab1 | 11 | 9.17e-04 | TCCTCAAACA | C C A C A G T | ACGTACGTTA |

**MOTIF 18** width = 7 sites = 10 llr = 71 E-value = 3.8e+010

**Simplified pos.-specific probability matrix**  
 A : 3 : : : a :  
 C a : a 5 8 : a  
 G : : : : 2 : :  
 T : 7 : 5 : : :

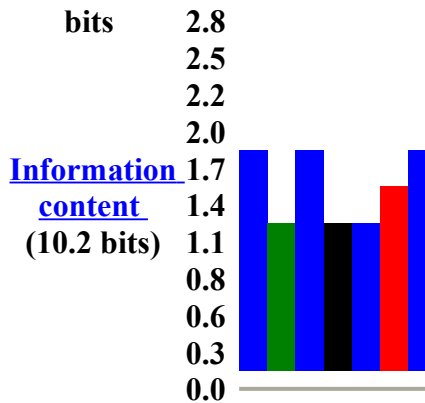

**Multilevel consensus sequence**  
 C T C C C A C  
 A T G

| NAME                  | START | P-VALUE  | SITES      |               |            |
|-----------------------|-------|----------|------------|---------------|------------|
| ab230506g10.r_G10.ab1 | 10    | 1.09e-04 | TATAAAATA  | C T C T C A C | ATCGCTGACA |
| ab230506b10.r_B10.ab1 | 49    | 1.09e-04 | ATGCCCATCA | C T C T C A C |            |
| A-11                  | 43    | 2.74e-04 | CTGGCATAGA | C T C C C A C | C          |
| ab230506e06.r_E06.ab1 | 24    | 2.74e-04 | ATAACCCTTA | C T C C C A C | ATCCGCGCTC |
| ab230506e02.r_E02.ab1 | 15    | 2.74e-04 | ACTAAAACGC | C T C C C A C | CCACTCCAAT |
| A-6                   | 45    | 3.26e-04 | GGTAGACAAC | C T C T G A C |            |
| A-14                  | 23    | 4.05e-04 | CGCACAATAT | C T C C G A C | TACATCGCCC |
| C05                   | 9     | 6.08e-04 | ATACATGC   | C A C T C A C | GCCAAGAACA |
| ab230506e03.r_E03.ab1 | 18    | 6.08e-04 | TCAAATGGAA | C A C T C A C | TCCATACAC  |
| ab230506a01.r_A01.ab1 | 42    | 9.13e-04 | CATGGCATAC | C A C C A C   | AA         |

**MOTIF 19** width = 7 sites = 10 llr = 73 E-value = 1.1e+009

**Simplified pos.-specific probability matrix**  
 A : 7 a 1 : : :  
 C 1 : : : : 5 a  
 G 7 : : : : 1 5 :  
 T 2 3 : 9 9 : :

bits 2.8





| NAME                  | START | P-<br>VALUE | SITES                                     |
|-----------------------|-------|-------------|-------------------------------------------|
| A-9                   | 33    | 1.03e-03    | ACTTAACAAC <b>A A T A C A</b> CTAACCATGT  |
| A-4                   | 45    | 1.03e-03    | CATACCGAGG <b>A A T A C A</b>             |
| ab230506e07.r_E07.ab1 | 9     | 1.03e-03    | AAGAAAAA <b>A A T A C A</b> GAACAAGTCA    |
| ab230506c12.r_C12.ab1 | 34    | 1.03e-03    | AGCCCTGCGC <b>A A T A C A</b> CCACTGAT    |
| ab230506c08.r_C08.ab1 | 17    | 1.03e-03    | AGAGAAATGC <b>A A T A C A</b> CTTTTACTACT |
| ab230506c03.r_C03.ab1 | 23    | 1.03e-03    | CGTGATAGAC <b>A A T A C A</b> CAAACTTGAG  |
| ab230506a12.r_A12.ab1 | 28    | 1.03e-03    | CTAACCCAAC <b>A A T A C A</b> AACCAATTAC  |
| G04                   | 2     | 1.86e-03    | A <b>A A T A C C</b> AGACCCACAC           |
| ab230506g04.r_G04.ab1 | 3     | 1.86e-03    | TA <b>A A T A C C</b> CAAGCAGCAA          |
| ab230506e02.r_E02.ab1 | 32    | 1.86e-03    | CCACTCCAAT <b>A A T A C C</b> GACACAAC TA |
